# Supplementary material for: Microfluidic Electroporation Arrays for Investigating Electroporation-Induced Cellular Rupture Dynamics
Source: MDPI journal article supplement (doi:10.3390/bios14050242), 2024-05-11
Supplement: s1 [file s1]

Supplementary Materials Appendix for

## **Microfluidic Electroporation Arrays for Investigating Electroporation-Induced Cellular Rupture Dynamics**

**Insu Park<sup>1,†</sup>, Seungyeop Choi<sup>2,3,4†</sup>, Youngwoo Gwak<sup>3</sup>, Jingwon Kim<sup>3</sup>, Gyeongjun Min<sup>3</sup>, Danyou Lim<sup>1</sup>,  
and Sang Woo Lee<sup>3,\*</sup>**

<sup>1</sup>Department of Biomedical Engineering, Konyang University, Daejeon, 35365, Republic of Korea

<sup>2</sup>School of Biomedical Engineering, Korea University, Seoul 02841, Republic of Korea

<sup>3</sup>Department of Biomedical Engineering, Yonsei University, Wonju, 26493, Republic of Korea

<sup>4</sup>BK21 Four Institute of Precision Public Health, Korea University, Seoul 02841, Republic of Korea

\*Correspondence: yusuklee@yonsei.ac.kr

†These authors contributed equally to this work.

## Supporting Table

**Table S1.** Abbreviation and Nomenclature

|                                  |                                                                                        |
|----------------------------------|----------------------------------------------------------------------------------------|
| <b>DOPC</b>                      | dioleoyl-phosphatidylcholine                                                           |
| <b>POPC</b>                      | 1-palmitoyl-2-oleoyl-phosphatidylcholine                                               |
| <b>DMPC</b>                      | 1,2-dimyristoyl-sn-glycero-3-phosphocholine                                            |
| <b>M<math>\beta</math>CD</b>     | methyl- $\beta$ -cyclodextrin                                                          |
| <b>PDMS</b>                      | polydimethylsiloxane                                                                   |
| <b>DMEM</b>                      | Dulbecco's modified Eagle's medium                                                     |
| <b>IDA</b>                       | interdigitated array                                                                   |
| <b>EDTA</b>                      | Ethylenediaminetetraacetic acid                                                        |
| <b>AC</b>                        | alternating current                                                                    |
| <b>FEM</b>                       | finite element method                                                                  |
| <b>CET</b>                       | critical electric tension                                                              |
| <b>TMP</b>                       | transmembrane potential                                                                |
| <b><math>C_{mem}</math></b>      | membrane capacitance of the cell                                                       |
| <b><math>r</math></b>            | cell radius                                                                            |
| <b><math>\sigma_{med}</math></b> | medium conductivity                                                                    |
| <b><math>f</math></b>            | the applied frequency                                                                  |
| <b><math>E</math></b>            | the applied electric field strength                                                    |
| <b><math>\sigma_c</math></b>     | critical electrical tension                                                            |
| <b><math>CLW</math></b>          | the change of capacitance as water displaces the lipids to form a pore                 |
| <b><math>\tau_0</math></b>       | The lifetime of the pore                                                               |
| <b><math>k_0</math></b>          | dissociation rate constant in the absence of applied force                             |
| <b><math>V_0</math></b>          | a pre-exponential factor (frequency factor $\sim 10^{13} \text{ s}^{-1}$ )             |
| <b><math>k_B</math></b>          | Boltzmann constant                                                                     |
| <b><math>T</math></b>            | absolute temperature                                                                   |
| <b><math>W_0</math></b>          | energy barrier                                                                         |
| <b><math>F</math></b>            | the external force for the reaction                                                    |
| <b><math>x_b</math></b>          | the reaction coordinate, which means the size of the membrane pore during cell rupture |
| <b><math>F_{max}</math></b>      | the mechanical force                                                                   |
| <b><math>\sigma_e</math></b>     | electrical tension                                                                     |
| <b><math>R\sigma_e</math></b>    | the electrical tension rate                                                            |
| <b><math>\omega</math></b>       | angular frequency                                                                      |

**Table S2.** Comparison between conventional techniques that induce cell perforation and this work.

| Method                                         | External energy source                                                                 | Target                         | High-throughput analysis | Single cell analysis | Rupture Dynamics<br>$\Delta w, K_B T$<br>Pore radius (nm) | Ref.           |
|------------------------------------------------|----------------------------------------------------------------------------------------|--------------------------------|--------------------------|----------------------|-----------------------------------------------------------|----------------|
| <b>Molecular dynamics (MD) simulation</b>      | Mechanical tension                                                                     | Lipid bilayer                  | No                       | No                   | 10 - 40, $K_B T$<br>1-1.45 nm                             | [18,28, 37,38] |
| <b>Micropipette aspiration</b>                 | Mechanical pressurization                                                              | Lipid bilayer                  | No                       | Yes                  | 10 - 19.8, $K_B T$<br>2 - 3.5 nm                          | [39-41]        |
| <b>Micro-indenter, AFM tip</b>                 | Mechanical compression                                                                 | Adherent cell<br>Lipid bilayer | No                       | Yes                  | N.A.                                                      | [42,43]        |
| <b>patch-clamp amplifier</b>                   | Electroporation                                                                        | Adherent/suspension cell       | No                       | Yes                  | 25, $K_B T$<br>0.5 nm                                     | [44,45]        |
| <b>Microfluidics-based<br/>Electroporation</b> | <b>Static</b><br>Electroporation<br>(Micro-/Nanopillar Arrays<br>Microbead Packing)    | Adherent cell                  | Yes                      | Yes                  | N/A                                                       | [6,46-49]      |
|                                                | <b>Continuous</b><br>Electroporation<br>(Channel Constriction<br>Microelectrode array) | Adherent/suspension cell       | Yes                      | No                   | N/A                                                       | [6,49-52]      |
| <b>*This work</b>                              | Electroporation<br>(Dielectrophoresis)                                                 | Adherent/suspension cell       | Yes                      | Yes                  | 13.59, $K_B T$<br>1.07 nm                                 |                |

## Supporting figure

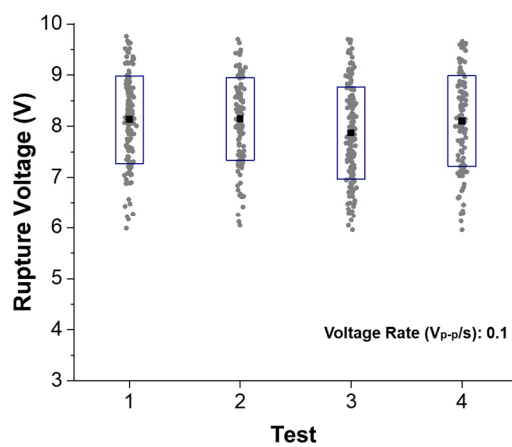

**Figure S1.** Reproducibility test of the DEP chip. Each test was conducted using the same DEP device with a voltage rate of 0.1 V<sub>p-p</sub>/s. All data showed no significant variations.
